# Supplementary material for: Survival and level of care among breast cancer patients with brain metastases treated with whole brain radiotherapy
Source: PubMed Central journal article supplement (PMC5680371; doi:10.1007/s10549-017-4466-3), 2017-08-22

**SURVIVAL AND LEVEL OF CARE AMONG BREAST CANCER PATIENTS WITH BRAIN  
METASTASES TREATED WITH WHOLE BRAIN RADIOTHERAPY**

**Breast cancer research and treatment**

Gabriella Frisk<sup>1</sup>, Beatrice Tinge<sup>1</sup>, Sara Ekberg<sup>1</sup>, Sandra Eloranta<sup>1</sup>, L Magnus Bäcklund<sup>2</sup>, Elisabet Lidbrink<sup>3</sup>,  
Karin E Smedby<sup>1</sup>

<sup>1</sup>Department of Medicine Solna, Clinical Epidemiology Unit, Karolinska Institute Solna,  
SE-171 76 Stockholm, Sweden

<sup>2</sup>Department of Medicine Solna, Unit for Experimental cardiovascular research, Karolinska  
Institute Solna, SE-171 76 Stockholm, Sweden

<sup>3</sup>Department of Oncology-Pathology, Karolinska Institute, Karolinska University Hospital Solna, SE-171 76  
Stockholm, Sweden

**Corresponding author:** Gabriella Frisk

E-mail: [gabriella.frisk@ki.se](mailto:gabriella.frisk@ki.se)

**Online Resource 1. Survival after WBRT among breast cancer patients with brain metastases in relation to performance status**

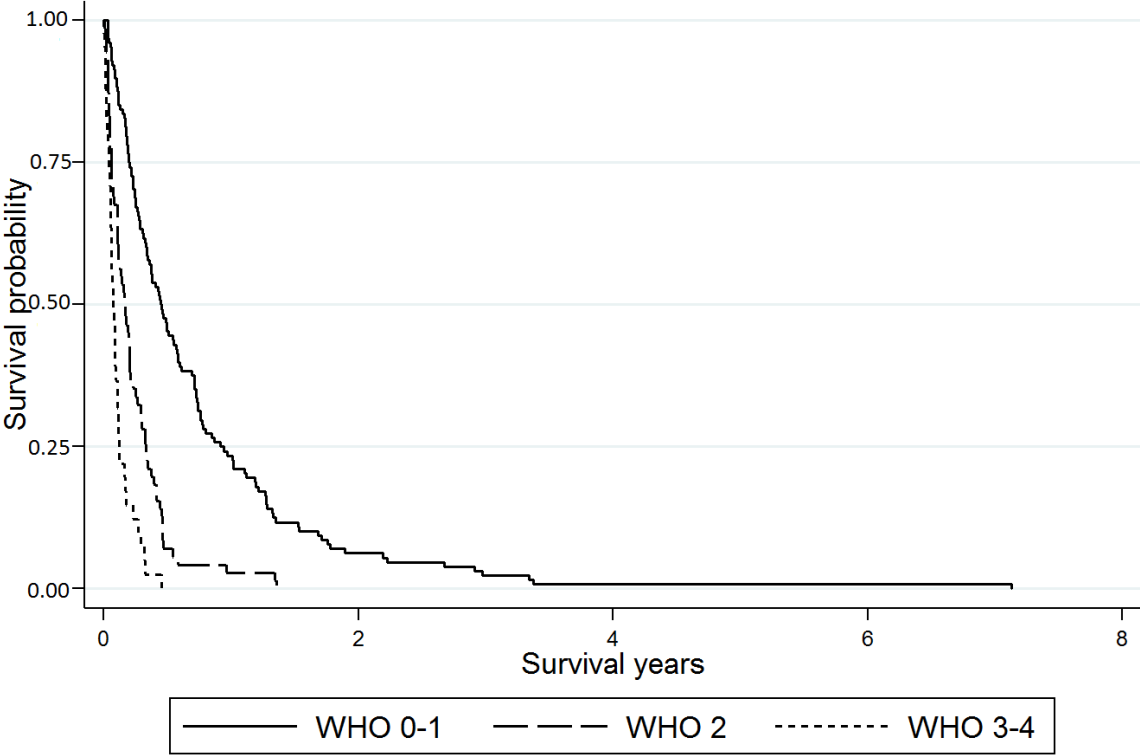

**Online Resource 2. Survival after WBRT among breast cancer patients with brain metastases, relation to level of care**

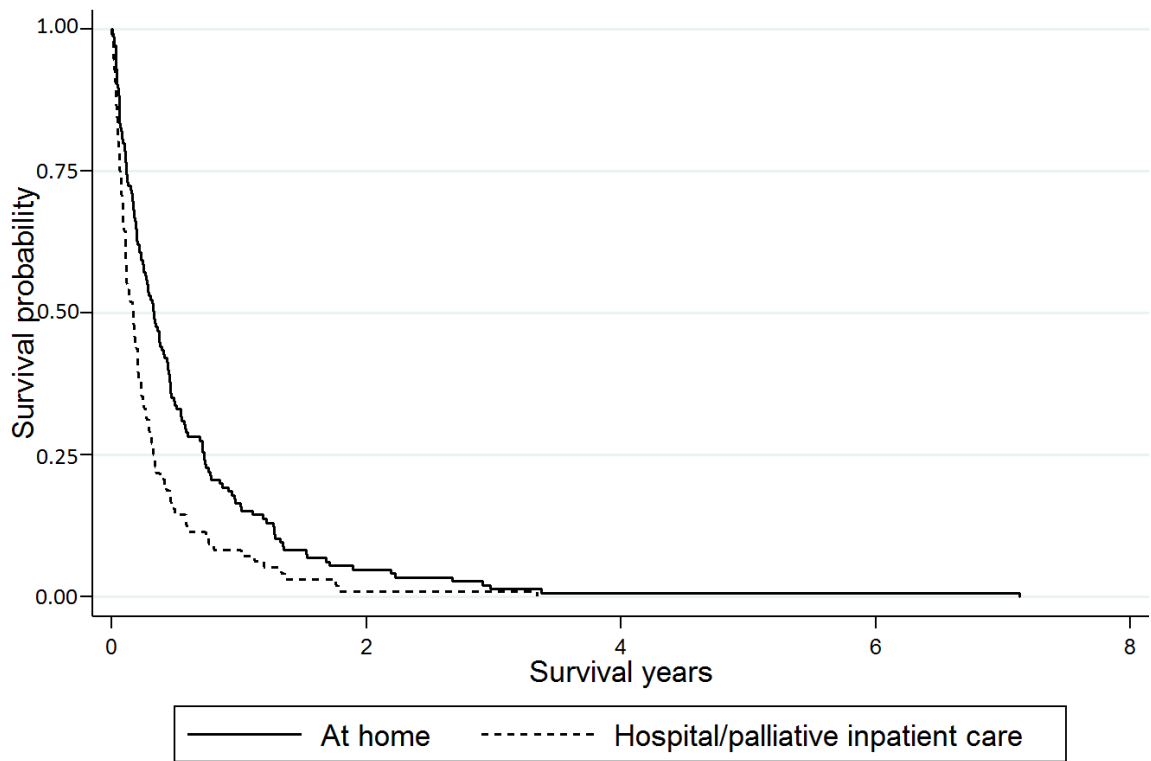

Supplement: 10549_2017_4466_MOESM1_ESM.pdf [file 10549_2017_4466_MOESM1_ESM.pdf]
